# Supplementary material for: The effect of preoperative chemotherapy on liver regeneration after portal vein embolization/ligation or liver resection in patients with colorectal liver metastasis: a systematic review protocol
Source: Research Square preprint supplement (doi:10.21203/rs.3.rs-50168/v4), 2020-12-01
Supplement: Supplementary file 1 [file 24c7451a57b9837694d2bd40.docx]

## Appendix 1 – Search strategy for electronic databases

**Pubmed**

("Liver"[Mesh] OR "Liver"[tiab] AND "Liver Neoplasms"[Mesh] OR "Hepatic"[tiab] OR "Hepatectomy"[tiab])

AND

("Neoplasm metastasis"[Mesh] OR metasta*[tiab] OR "secondary"[tiab])

AND

("Liver Regeneration"[Mesh] OR "Regeneration"[Mesh] OR "Regeneration"[tiab] OR "Hypertrophy"[Mesh] OR "hypertrophy"[tiab])

AND

(("chemotherapy"[tiab] OR "Antineoplastic Agents"[Mesh]) AND ("preoperative"[tiab] OR "before"[tiab]))

Resultats →50 referències [ accés: pubmed.pdf ]

**Scopus**

TITLE-ABS(("Liver" AND "Hepatic" OR "Hepatectomy") AND (metasta* OR "secondary") AND ("Regeneration" OR "hypertrophy") AND "chemotherapy" AND ("preoperative" OR "before"))

Resultats → 62 referències [ accés: scopus.pdf ]

**Web of Science**

TS=(("Liver" AND "Hepatic" OR "Hepatectomy") AND (metasta* OR "secondary") AND ("Regeneration" OR "hypertrophy") AND "chemotherapy" AND ("preoperative" OR "before"))

*Período de tiempo: Todos los años. Bases de datos: WOS, CCC, DIIDW, KJD, MEDLINE, RSCI, SCIELO.*

*Idioma de búsqueda=Auto*

Resultats →193 referències [accés: webofscience.pdf ]

**Embase**

('liver'/exp OR 'liver':ti,ab) AND ('liver neoplasms'/exp OR 'hepatic':ti,ab OR 'hepatectomy':ti,ab OR 'liver resection'/exp) AND ('metastasis'/exp OR metasta*:ti,ab OR 'secondary':ti,ab) AND ('liver regeneration'/exp OR 'regeneration'/exp OR 'regeneration':ti,ab OR 'hypertrophy'/exp OR 'hypertrophy':ti,ab) AND ('chemotherapy':ti,ab OR 'chemotherapy'/exp OR 'antineoplastic agents'/exp) AND ('preoperative':ti,ab OR 'preoperative period'/exp OR 'before':ti,ab)

Resultats → 341 referències [accés: embase.pdf]

**Cochrane**

(("Liver" AND "Hepatic" OR "Hepatectomy") AND (metasta* OR "secondary") AND ("Regeneration" OR "hypertrophy") AND "chemotherapy" AND ("preoperative" OR "before")) in Title Abstract Keyword - (Word variations have been searched)

Resultats →7 referències [accés: cochrane.txt ]
